# THE AMERICAN JOURNAL OF PSYCHIATRY

---

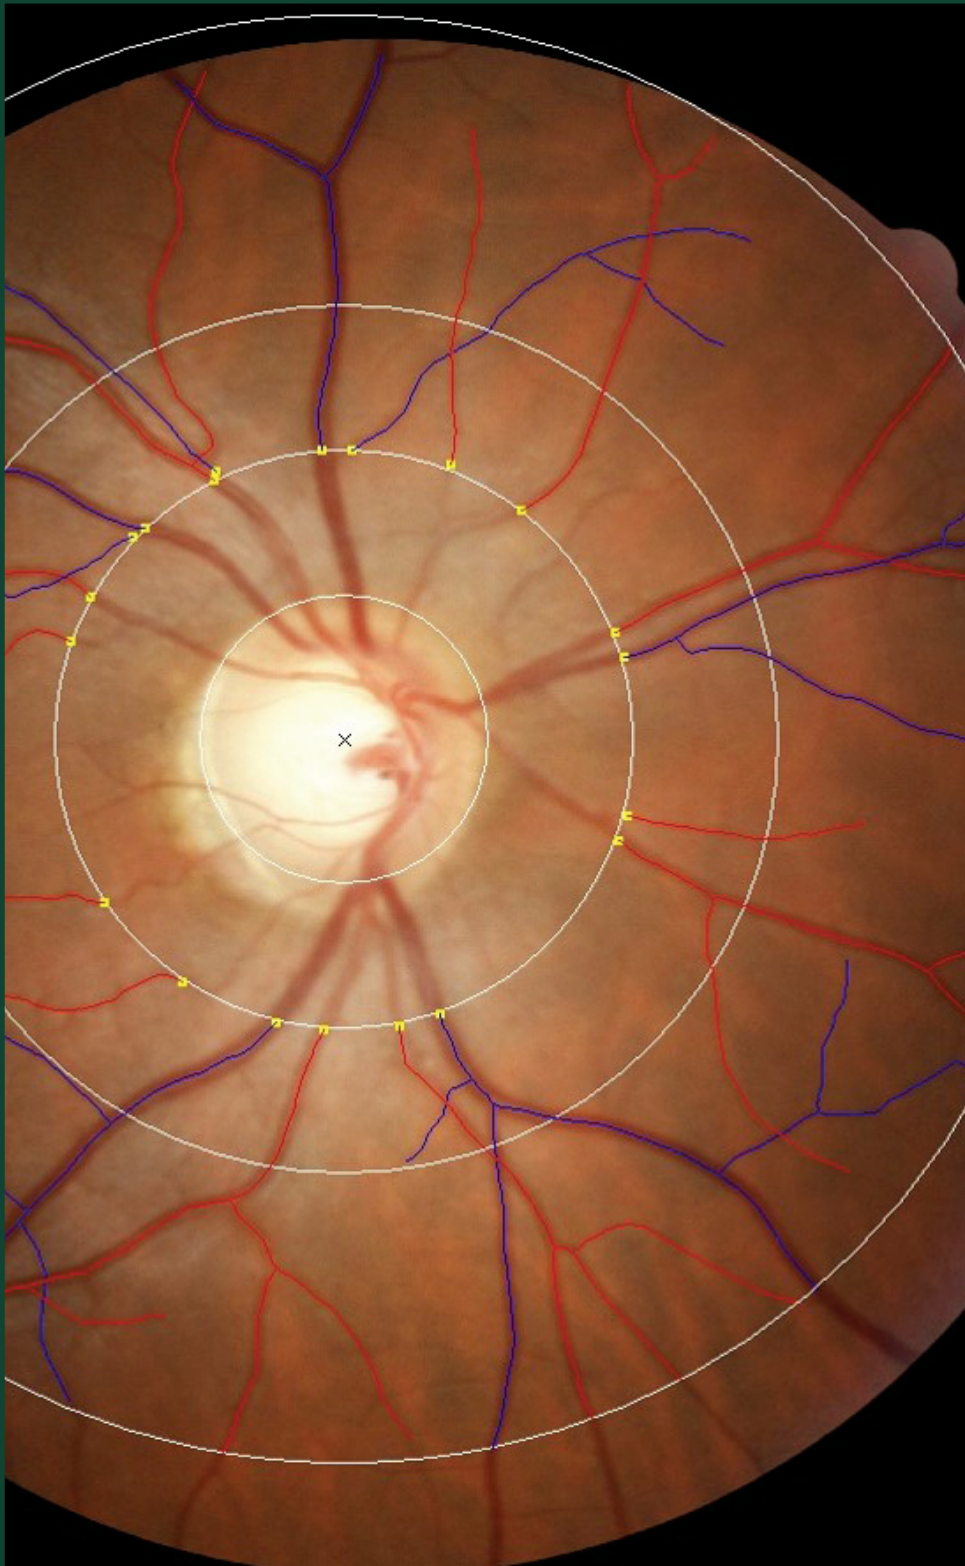

**The Hotel Study: Multimorbidity  
in a Community Sample Living in  
Marginal Housing**

Fidel Vila-Rodriguez, M.D., et al 1413

**Assisting Social Security Disability  
Insurance Beneficiaries With  
Schizophrenia, Bipolar Disorder,  
or Major Depression in Returning  
to Work**

Robert E. Drake, M.D., Ph.D., et al 1433

◀ **Microvascular Abnormality in  
Schizophrenia as Shown by  
Retinal Imaging**

Madeline H. Meier, Ph.D., et al 1451

**Varenicline, Smoking Cessation,  
and Neuropsychiatric Adverse  
Events**

Robert D. Gibbons, Ph.D., and  
J. John Mann, M.D. 1460

**December 2013**

**Volume 170 • Number 12**

---

Official Journal of the  
AMERICAN PSYCHIATRIC ASSOCIATION

---

[ajp.psychiatryonline.org](http://ajp.psychiatryonline.org)
