# THE AMERICAN PSYCHIATRIC ASSOCIATION

1000 Wilson Blvd., Suite 1825, Arlington, VA 22209-3901  
(888) 357-7924 (toll-free inside the U.S. and Canada) / (703) 907-7300  
web site: [www.psychiatry.org](http://www.psychiatry.org) • e-mail: [apa@psych.org](mailto:apa@psych.org)

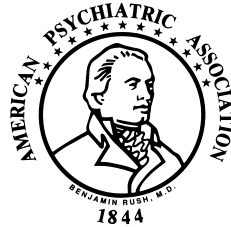

## OFFICERS 2013–2014

|                 |                            |
|-----------------|----------------------------|
| President       | Jeffrey A. Lieberman, M.D. |
| President-Elect | Paul Summergrad, M.D.      |
| Treasurer       | David Fassler, M.D.        |
| Secretary       | Maria A. Oquendo, M.D.     |

## ASSEMBLY

|               |                        |
|---------------|------------------------|
| Speaker       | Melinda L. Young, M.D. |
| Speaker-Elect | Jenny L. Boyer, M.D.   |
| Recorder      | Glenn A. Martin, M.D.  |

## MEDICAL DIRECTOR'S OFFICE

Medical Director and CEO    Saul Levin, M.D., M.P.A.

## BOARD OF TRUSTEES

|                              |                         |                             |
|------------------------------|-------------------------|-----------------------------|
| Jeffrey Akaka, M.D.          | Jeffrey Geller, M.D.    | Phillip M. Murray, M.D.     |
| Christina J. Arredondo, M.D. | Marc David Graff, M.D.  | James E. Niningler, M.D.    |
| Carol A. Bernstein, M.D.     | James A. Greene, M.D.   | John M. Oldham, M.D.        |
| Lara J. Cox, M.D., M.S.      | Dilip V. Jeste, M.D.    | Uyen-Khanh Quang-Dang, M.D. |
| Brian Crowley, M.D.          | Judith F. Kashtan, M.D. | Gail E. Robinson, M.D.      |
| Anita S. Everett, M.D.       | Molly K. McVoy, M.D.    | Erik R. Vanderlip, M.D.     |

## PUBLISHER

Rebecca D. Rinehart

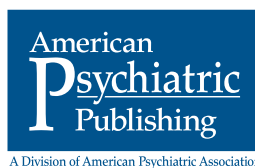

THE AMERICAN PSYCHIATRIC ASSOCIATION  
Chairpersons of Councils, Commissions, Committees, and Task Forces

Standing Committees

**Bylaws**

Rebecca W. Brendel, M.D., J.D.

**Elections**

Barry K. Herman, M.D.

**Ethics**

Richard D. Milone, M.D.

**Finance and Budget**

Alan F. Schatzberg, M.D.

*Audit*

David Fassler, M.D.

*Investment Oversight*

Larry R. Faulkner, M.D.

**Joint Reference**

Paul Summergrad, M.D.

**Membership**

Jonathan M. Amiel, M.D.

**Nominating**

Dilip V. Jeste, M.D.

**Tellers**

Hind Benjelloun, M.D.

**Council on Addiction Psychiatry**

Frances R. Levin, M.D.

**Council on Advocacy and Government Relations**

Robert Paul Cabaj, M.D.

*Advocacy and Litigation Funding*

Renee L. Binder, M.D.

**Council on Children, Adolescents, and Their Families**

Louis J. Kraus, M.D.

*Agnes Purcell McGavin Award*

Christopher J. McDougle, M.D.

*Blanche F. Ittleson Research Award*

Matthew W. State, M.D.

**Council on Communications**

Jeffrey A. Borenstein, M.D.

**Council on Geriatric Psychiatry**

Robert P. Roca, M.D.

**Council on Healthcare Systems and Financing**

Harsh K. Trivedi, M.D.

*Reimbursement for Psychiatric Care*

Bruce J. Schwartz, M.D.

*RBRVS, Codes and Reimbursement*

Ronald M. Burd, M.D.

**Council on Medical Education and Lifelong Learning**

Richard F. Summers, M.D.

*APA Public Psychiatry Fellowship Selection Committee*

Christina V. Mangurian, M.D.

*APA/SAMHSA Minority Fellowship Selection and Advisory*

Altha J. Stewart, M.D.

*Scientific Program*

Philip R. Muskin, M.D.

*Scientific Program Committee of the Institute on Psychiatric Services*

Altha J. Stewart, M.D.

*Task Force to Update the Ethics Annotations*

Laura W. Roberts, M.D.

*Vestermark Award Committee*

Joel Yager, M.D.

**Council on Minority Health and Health Disparities**

Sandra C. Walker, M.D.

**Council on Psychiatry And Law**

Steven K. Hoge, M.D.

*Isaac Ray/Human Rights Award*

Steven K. Hoge, M.D.

*Judicial Action*

Paul S. Appelbaum, M.D.

*Manfred S. Guttmacher Award*

David A. Lowenthal, M.D.

**Council on Psychosomatic Medicine  
(Consultation Liaison Psychiatry)**

Joel E. Dimsdale, M.D.

**Council on Quality Care**

Joel Yager, M.D.

*Electronic Health Records*

Steven Roy Daviss, M.D.

*Steering Committee on Practice Guidelines*

Michael J. Vergare, M.D.

**Council on Research**

Dwight L. Evans, M.D.

*Psychiatric Dimensions of Disasters*

Charles R. Marmar, M.D.

*Research Awards*

Timothy B. Walsh, M.D.

*Task Force to Revise the Practice of Electroconvulsive Therapy*

Sarah H. Lisanby, M.D.

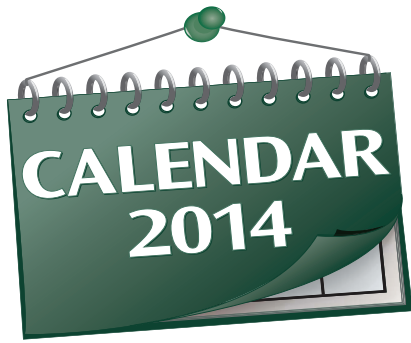

For free listing of your organization's official annual or regional meeting, please send us the following information: sponsor, location, inclusive dates, type and number of continuing education credits (if available), and the name, address, and telephone number of the person or group to contact for more information. In order for an event to appear in our listing, all notices and changes must be received at least 6 months in advance of the meeting and should be addressed to:

Calendar, American Journal of Psychiatry, 1000 Wilson Boulevard, Suite 1825, Arlington, VA 22209-3901, [swstrate@psych.org](mailto:swstrate@psych.org) (e-mail).

Because of space limitations, only listings of meetings of the greatest interest to Journal readers may be included.

## DECEMBER 2013

**December 5–8**, 24th Annual Meeting and Symposium, American Academy of Addiction Psychiatry, Scottsdale Resort and Conference Center, Scottsdale, Ariz. [www.aaap.org/meetings-and-events/2013-annual-meeting](http://www.aaap.org/meetings-and-events/2013-annual-meeting) (web site).

## FEBRUARY

**February 16–20**, 25th Annual Meeting of the American Neuropsychiatric Association, Seattle, Wash. [www.anpaonline.org](http://www.anpaonline.org) (web site).

## MARCH

**March 12–15**, 43rd Annual Meeting of the American Association of Directors of Psychiatric Residency Training, Tucson, Ariz. [www.aadprt.org](http://www.aadprt.org) (web site).

## MAY

**May 3–7**, 167th Annual Meeting, American Psychiatric Association, New York, NY. Contact: APA Annual Meetings Dept., 1000 Wilson Blvd, Suite 1825, Arlington, VA 22209; (703) 907-7815 (tel); <http://www.psych.org/learn/annual-meeting> (web site).

## JULY

**July 8–13**, 28th International Congress of Applied Psychology, Palais de Congrès de Paris, France. Contact [exh@icap2014.com](mailto:exh@icap2014.com) (e-mail), [www.icap2014.com](http://www.icap2014.com) (web site).

**July 30–August 1**, 39th Annual University of Colorado Psychiatry Conference, The Gant, Aspen, featuring Glenn Gabbard, M.D., and John Gunderson, M.D., *Good Psychiatric Management*. Contact: Joelynn Jewell, [Joelynn.Jewell@ucdenver.edu](mailto:Joelynn.Jewell@ucdenver.edu) (e-mail), (303) 724-7401 (tel) for information and brochure.

# Integrated Care Systems

*Psychiatric News* features highly informative content on the emerging practice model of integrated care.

Learn about:

- Predominant models of integrated care and the role psychiatrists play
- Working in integrated care settings
- Payment and delivery models
- APA resources on integrated care and delivery systems initiatives

For new psychiatrists entering the field, understanding the key role of systems of care has never been more important. Research published each month in *Psychiatric Services* will help Residents play a vital role in the systems of care where they work, which is why the American Psychiatric Association provides Residents full-text online access to *Psychiatric Services* content as a member benefit.

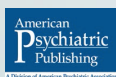

[www.appi.org](http://www.appi.org) • 1-800-368-5777 • Email: [appi@psych.org](mailto:appi@psych.org) • [psychnews.psychiatryonline.org](http://psychnews.psychiatryonline.org)

**Integrated Care: What Does It Mean for You?**

"Integrated care" is everywhere—in theory, at least, and increasingly in practice. The concept is a feature of the delivery-system improvements in the new health care reform law, and policymakers and many clinicians have converged on the idea that general medical and behavioral health services should be brought together in a patient-centered manner. Today, a smart but dedicated and growing cadre of psychiatrists is advancing the cause of integrated care and the participation of psychiatrists in collaborative care models.

APA has established a number of initiatives in this area, headed up by the Work Group on Integrated Care of the Council on Healthcare Systems and Financing, chaired by Lori Rauer, M.D., medical director of Asa Health System in Durango, Colo., and the Board of Trustees Health Care Reform Strategic Action Work Group, chaired by Howard Goldman, M.D., director of the Network on Mental Health Policy Research (funded by the MacArthur Foundation) and editor of the *APA journal Psychiatric Services*. Work group members include Jürgen Unzler, M.D., who is director of the Center for Health Solutions Practice at the University of Washington and one of the first psychiatrists to be licensed in Washington and Oregon with Wayne Katon, M.D., Unzler began developing models in mental health and primary care and testing them in diverse primary care settings. Previously working on these issues was the APA Board of Psychiatry and Healthcare Reform, chaired by Paul Summergrad, chief chair of psychiatry at Tufts University.

This system is a new opportunity for psychiatrists—another option on how to use their license to care for people—but it is not a requirement, and it is not a new specialty. However, psychiatrists can work part time in an integrated care setting, or full time in a traditional inpatient or outpatient practice (they call it "collaborative care" or "integrated care"). There are degrees of integrated care ranging from the original "collaborative care" model, in which a psychiatrist and a primary care physician practiced in the hospital setting, to co-located care, in which health services are offered in the same location, to a model—called "integrated care"—that involves a psychiatrist working in consultation with a primary care physician to manage the behavioral health of a defined population of patients referred to as "collaborative care," and the two terms—integrated care and collaborative care—are often used interchangeably. However, for the purposes of this newsletter, the term "integrated care" will be used.

Photo: samchaj/shutterstock

**Psychiatric News**

From the American Psychiatric Association

SEARCH

Clinical & Research Professional Government & Legal In the Community APA & Meetings

Professional News

September 20, 2013 | DOI: 10.1176/appi.ps.2013.13.1

**Integrated Care: What Does It Mean for You?**

Direct | E-mail | Discuss | Reprints

A daily Clinic on The Air

Related Article

Integrate care in Psychiatric News

Why the APA is at Psychiatric News

Newsletters

Psychiatric News

View More

PSYCHIATRY

Priority Code AH1329

# There's So Much More to AJP Than Meets the Page!

Visit *The American Journal of Psychiatry's* website on PsychiatryOnline for the following features!

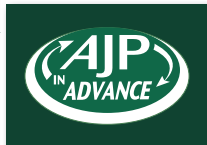

## AJP in Advance

**The very latest research advances!**

At **AJP in Advance**, you can discover the following before their appearance in print:

### **Serotonin Reuptake Inhibitors and Upper Gastrointestinal Bleeding**

Short-term SSRI use—even as little as 7 days—elevated the risk of upper gastrointestinal bleeding, especially in male patients. Just as with NSAIDs and aspirin, physicians should carefully monitor for this side effect.

### **Childhood Separation Anxiety and the Treatment of Adult Anxiety**

Adults with anxiety disorders don't always respond to pharmacological and psychotherapeutic interventions. Separation anxiety during childhood could be one reason why.

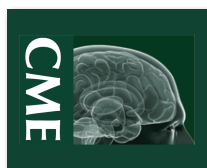

## AJP CME

Three articles in this issue form the basis of a short course with questions that can be answered for up to 1 *AMA PRA Category 1 Credit™* each by visiting <http://psychiatryonline.org/cme.aspx> and clicking on the "American Journal of Psychiatry" tab.

CME credit is issued only online, and a paid subscription to AJP CME course program is required. This month's courses appear on pages 1509–1512.

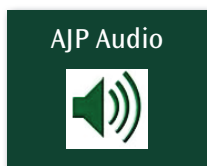

## Have You Heard?

With AJP Audio you can listen to highlights of this issue. This month, Deputy Editor Susan Schultz introduces the DSM-5 diagnosis of somatic symptom disorder, considers a case of psychological vulnerability to persistent amnesia following anesthesia, describes an analysis of neuropsychiatric events in people taking varenicline to quit smoking, and describes a program to encourage paid employment for SSDI recipients with mental illness.

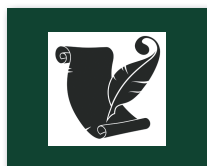

## Revisit the field's rich history!

**50 years ago this month:**

HUMAN RELIABILITY IMPLICATIONS OF THE U. S. NAVY'S EXPERIENCE IN SCREENING AND SELECTION PROCEDURES

The Navy's experience over the past 20 years in psychiatric assessment is subjected to a systematic review, and an effort is made to identify variables which are critical to the effectiveness of such programs.

# The Residents' JOURNAL

## The Residents' JOURNAL

a publication of  
The American Journal of Psychiatry

November 2013

Volume 8

Issue 11

### Inside

- 2 Adolescent Substance Use Disorders  
Justine Wittenauer, M.D.  
Michael Ascher, M.D.
- 5 Mindfulness-Based Approaches in Adolescent Psychiatry  
Michael Nevarez, M.D.
- 8 Consultation to Schools After the Boston Marathon Bombings  
Sara M. Coffey, M.D.
- 10 Psychiatrist: Turn That Analytical Eye Inward! Arguments for Why Residency Should Include Discussion of Philosophy of Psychiatry  
Aaron J. Hauptman, M.D.
- 11 The Importance of a Name  
Ayesha Dua, M.D.
- 12 Successful Cognitive and Emotional Aging  
David Hsu, M.D.
- 16 Test Your Knowledge
- 15 Author Information for *The Residents' Journal* Submissions and Upcoming Themes

### In This Issue

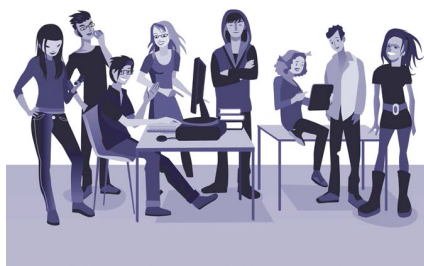

This month's issue of the *Residents' Journal* focuses on the topic of adolescent psychiatry. The first onset of many mental illnesses often occurs during adolescence, resulting in impaired functioning in homes, in schools, and among peers, and early identification, assessment, and treatment are fundamental to outcome in adulthood. First, Justine Wittenauer, M.D., and Michael Ascher, M.D., present informative data on the risk factors, assessment tools, and intervention models for substance use disorders in adolescence. Next, Michael Nevarez, M.D., discusses how mindfulness-based approaches can be beneficial in treating adolescents with more common disorders, such as anxiety and mood disorders, as well as those with autism spectrum disorder, substance abuse, learning disabilities, and conduct disorder. Last, Sara M. Coffey, M.D., provides enlightening information and recommendations on how psychiatrists can provide consultation to schools after youths are exposed to a traumatic event.

Editor-in-Chief  
Arshya Vahabzadeh, M.D.  
Deputy Editor  
Misty Richards, M.D., M.S.  
Associate Editor  
David Hsu, M.D.  
Staff Editor  
Angela Moore

Guest Section Editor  
Justine Wittenauer, M.D.  
Editors Emeriti  
Sarah B. Johnson, M.D.  
Molly McVay, M.D.  
Joseph M. Carimele, M.D.  
Sarah M. Foyad, M.D.  
Monifa Seawell, M.D.

*The Residents' Journal* accepts manuscripts authored by medical students, resident physicians, and fellows. To submit your paper, please visit the manuscript submission site at [mc.manuscriptcentral.com/appi-ajp](http://mc.manuscriptcentral.com/appi-ajp) and either create an account or use your existing account. For manuscript type, select "Residents." Then follow the instructions to upload your manuscript. Residents who are interested in participating as Guest Section Editors should e-mail *The Residents' Journal* Editor-in-Chief Arshya Vahabzadeh at [vahab1789@gmail.com](mailto:vahab1789@gmail.com).

*The Residents' Journal* is sent free-of-charge to all psychiatry residents. Anyone interested in being included on the distribution list should contact Angela Moore, *The Residents' Journal* staff editor at [ajp@psych.org](mailto:ajp@psych.org) with "Subscribe to Residents' Journal" in the subject line.

To access the complete *Residents' Journal* archives, visit [ajp.psychiatryonline.org/residents\\_journal.aspx](http://ajp.psychiatryonline.org/residents_journal.aspx)

# Contents

- A16 Editorial Board  
A18 Highlights of this issue

## Editorials

- 317 **Adults with attention-deficit hyperactivity disorder – diagnosis or normality?**  
P. J. Shah and M. J. S. Morton
- 320 **Somatic symptoms: beyond ‘medically unexplained’**  
M. Sharpe
- 322 **Gun violence and media effects: challenges for science and public policy**  
M. Elson and C. J. Ferguson
- 325 **Injectable heroin – effective treatment for opiate misusers, but is it cost-effective?**  
R. M. Hunter and S. Hasan

## Review article

- 327 **The past and future of delusions research: from the inexplicable to the treatable**  
P. A. Garety and D. Freeman

- 333 **Psychosocial influences on suicide – in 100 words**  
Keith Hawton and Gustavo Turecki

## Papers

- 334 **Alcohol assessment and feedback by email for university students: main findings from a randomised controlled trial**  
J. McCambridge, M. Bendtsen, N. Karlsson, I. R. White, P. Nilsen and P. Bendtsen
- 341 **Cost-effectiveness of injectable opioid treatment v. oral methadone for chronic heroin addiction**  
S. Byford, B. Barrett, N. Metrebian, T. Groshkova, M. Cary, V. Charles, N. Lintzeris and J. Strang
- 350 **Decision aid on disclosure of mental health status to an employer: feasibility and outcomes of a randomised controlled trial**  
C. Henderson, E. Brohan, S. Clement, P. Williams, F. Lassman, O. Schauman, L. Dockery, S. Farrelly, J. Murray, C. Murphy, M. Slade and G. Thornicroft

- 357 **This child – poem**  
Miriam Brown

- 358 **Effects of combined pharmacotherapy and psychotherapy for improving work functioning in major depressive disorder**  
R. W. Lam, S. V. Parikh, R. Ramasubbu, E. E. Michalak, E. M. Tam, A. Axler, L. N. Yatham, S. H. Kennedy and C. V. Manjunath

- 366 **Feasibility of a supported self-management intervention for relatives of people with recent-onset psychosis: REACT study**  
F. Lobban, D. Glentworth, L. Chapman, L. Wainwright, A. Postlethwaite, G. Dunn, V. Pinfold, W. Larkin and G. Haddock

- 372 **On Aliens and Alienists: Ethnic Minorities and Psychiatry (1982) – Reflection**  
Cornelius Katona

- 373 **Total somatic symptom score as a predictor of health outcome in somatic symptom disorders**  
B. Tomenson, C. Essau, F. Jacobi, K. H. Ladwig, K. A. Leiknes, R. Lieb, G. Meinschmidt, J. McBeth, J. Rosmalen, W. Rief, A. Sumathipala and F. Creed on behalf of EURASMUS Population Based Study Group

- 380 **The prophet Samuel, hypnagogic hallucinations and the voice of God – psychiatry and sacred texts**  
Christopher C. H. Cook

- 381 **Impact of patient involvement in mental health research: longitudinal study**  
L. Ennis and T. Wykes

- 386 **Social avatar – in 100 words**  
David Brunskill

## Short report

- 387 **Predicting future violence among individuals with psychopathy**  
J. W. Coid, S. Ullrich and C. Kallis

## Columns

- 389 Correspondence  
391 Contents of *Advances in Psychiatric Treatment*  
392 Corrections  
393 Book reviews  
395 Contents of the *American Journal of Psychiatry*  
396 From the Editor's desk

## Cover picture

*Morule – klimatrony. Jednostki mieszkalne o zmiennych przegrodach klimatycznych* [Morule – klimatrony. Housing units with mobile climatic partitions], 1963.  
Jan Gluszek Dagarama (1937–2000)

Jan Gluszek Dagarama was a poet, philosopher, visionary and one of the leading representatives of Polish futurist architecture. Although he considered himself an ‘anti-architect’, Gluszek shared the modernist conviction (even moral obligation) that it was only by harnessing the untamed powers of the imagination and moving beyond conventional materials and technologies that one could truly create a space for living and dreaming. Diagnosed with schizophrenia, Gluszek terminated his architectural studies at the Kraków University of Technology, but continued to develop his own projects and to define a highly distinctive mythical architectural manifesto articulated in his treatise, *Utopia Documented – De Labore Solis* (From the Hardship of the Sun).

© Muzeum Architektury we Wrocławiu 2013.

Photographer: Mirosław Łanowiecki. The work was recently displayed at the Hayward Gallery, London during the exhibition ‘Alternative guide to the universe’ 11 June–26 August 2013.

We are always looking for interesting and visually appealing images for the cover of the *Journal* and would welcome suggestions or pictures, which should be sent to Dr Allan Beveridge, British Journal of Psychiatry, 21 Prescot Street, London E1 8BB, UK or [bjp@rcpsych.ac.uk](mailto:bjp@rcpsych.ac.uk).

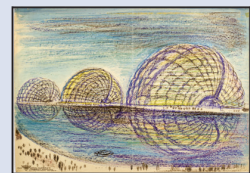

Source: https://psychiatryonline.org/doi/suppl/10.1176/ajp.2013.170.issue-12/suppl_file/front.pdf
