# THE AMERICAN JOURNAL OF PSYCHIATRY

## En este número

A14

### Perspectivas

#### Editoriales

- 1379 Ayudando (a algunos) Beneficiarios del Seguro Social por Incapacidad (SSDI) con Enfermedades Mentales Graves en su Reincorporación al Trabajo**  
Richard G. Frank
- 1382 Mirando la Esquizofrenia a los Ojos**  
Dolores Malaspina **Audio**
- 1385 Re-evaluación de la Seguridad de la Vareniclina**  
A. Eden Evins **Audio**
- 1388 Resumen del 2013**  
Robert Freedman, David A. Lewis, Robert Michels, Daniel S. Pine, Susan K. Schultz, Carol A. Tamminga, y Arshya Vahabzadeh **Audio**

#### Comentario

- 1393 ¿Cuál es el Próximo Paso para el Trastorno de Síntomas Somáticos?**  
Joel E. Dimsdale y James Levenson **Audio**

#### Introspección

- 1396 Donde el Todo y Nada tratan de Salud Mental: Más allá del Trastorno de Estrés Postraumático para los Sirios Desplazados**  
Rami Bou Khalil

#### Conferencia de Caso Clínico

- 1398 Amnesia Persistente Post-Anestesia en un Paciente con un Historial de Estado de Fuga Disociativa: El Caso para la Hipótesis “de Dos Golpes”**  
Inna Roberts, Natalie Gluck, Michael S. Smith, y Mary F. Morrison **Audio** **Guías clínicas**

#### Imágenes en Psiquiatría

- 1401 Socios en la “Interfaz”**  
Don R. Lipsitt

#### Resúmenes y Reseñas

- 1403 El Trastorno Afectivo Estacional (TAE) y los Fotorreceptores que no son tan Simples**  
Dan A. Oren, Marek Koziorowski, y Paul H. Desan **EMC**

## Nuevas Investigaciones

### Artículos

- 1413 El Estudio del Hotel: Multimorbilidad en una Muestra de una Comunidad que Habita en Viviendas Marginales**  
Fidel Vila-Rodriguez, William J. Panenka, Donna J. Lang, Allen E. Thornton, Talia Vertinsky, Hubert Wong, Alasdair M. Barr, Ric M. Procyshyn, J.J. Sidhu, Geoffrey N. Smith, T. Buchanan, Mel Krajden, Michael Krausz, Julio S. Montaner, G. William MacEwan, y William G. Honer
- 1423 Costos del Programa Tratamiento Asistido de Pacientes Externos: ¿Pueden Ahorrar Dinero los Estados?**  
Jeffrey W. Swanson, Richard A. Van Dorn, Marvin S. Swartz, Pamela Clark Robbins, Henry J. Steadman, Thomas G. McGuire, y John Monahan
- 1433 Ayuda para Reincorporación al Trabajo de Beneficiarios del Seguro Social por Incapacidad con Esquizofrenia, Trastorno Bipolar o Depresión Mayor**  
Robert E. Drake, William Frey, Gary R. Bond, Howard H. Goldman, David Salkever, Alexander Miller, Troy A. Moore, Jarnee Riley, Mustafa Karakus, y Roline Milfort **Audio** **Guías clínicas** **EMC** **Editorial**
- 1442 Reconocimiento de Trastornos Mentales por Parte del Servicio de Urgencias y Resultado a Corto Plazo de la Autoagresión Deliberada**  
Mark Olfson, Steven C. Marcus, y Jeffrey A. Bridge
- 1451 Anomalía Microvascular en Esquizofrenia Demostrada por Imágenes Proyectadas sobre la Retina**  
Madeline H. Meier, Idan Shalev, Terrie E. Moffitt, Shitij Kapur, Richard S.E. Keefe, Tien Y. Wong, Daniel W. Belsky, HonaLee Harrington, Sean Hogan, Renate Houts, Avshalom Caspi, y Richie Poulton **Audio** **EMC** **Editorial**
- 1460 Vareniclina, Dejar de Fumar y Eventos Neuropsiquiátricos Adversos**  
Robert D. Gibbons y J. John Mann **Audio** **Guías clínicas** **Editorial**
- 1468 Síndrome del QT Largo Inducido por Medicamentos en Pacientes Psiquiátricos Adultos Hospitalizados: ESOP, el Estudio Transversal de Cinco Años**  
François R. Girardin, Marianne Gex-Fabry, Patricia Berney, Dipen Shah, Jean-Michel Gaspoz, y Pierre Dayer **Audio** **Guías clínicas**

- 1477 Grosor de la Corteza Paralímbica en el Primer Episodio de Depresión: Evidencia de Diferencias en la Regulación Anímica Relacionadas con los Rasgos**  
Philip van Eijndhoven, Guido van Wingen, Maartje Katzenbauer, Wouter Groen, Ralf Tepest, Guillen Fernández, Jan Buitelaar, y Indira Tendolkar
- 1487 Correlatos Neuronales de Distracción Emocional en Pacientes con Trastorno Bipolar, Familiares no Afectados y Personas con Personalidad Hipomaníaca**  
Philipp Kanske, Janine Heissler, Sandra Schönfelder, Johanna Forneck, y Michèle Wessa

## Comunicados y Actualizaciones

### Cartas al Editor

- 1497** Alteraciones en la respuesta de la ínsula al procesamiento del sabor dulce en anorexia y bulimia nervosa recuperadas: ¿Cuestión de sensibilidad al desagrado?  
Las pruebas genéticas prenatales con análisis con 'microarrays' identifican variantes de alto riesgo para la esquizofrenia y otros trastorno de inicio tardío  
TEC para las discapacidades del desarrollo y las enfermedades mentales graves
- 1499 Correction**

### Reseñas Bibliográficas

- 1500** A Month in the Country [Un mes en el campo]  
Art and Psychoanalysis [Arte y psicoanálisis]  
The Swerve: How the World Became Modern [El giro: de cómo un manuscrito olvidado contribuyó a crear el mundo moderno]  
Lovers Lane (La "Cojera" de los Amantes)

### Otros Temas de Interés

- 1503** Agradecimientos a los Revisores  
**1509** Educación Médica Continuada  
**A7** Directivos de la American Psychiatric Association  
**A9** Calendario  
**A12** Contenidos del *British Journal of Psychiatry*

### Cubierta

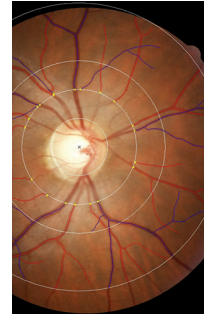

#### Audio

artículo en AJP Audio: archivo .mp3 descargable de [ajp.psychiatryonline.org](http://ajp.psychiatryonline.org)

#### Guías clínicas

este artículo ofrece guías clínicas (ver pagina "En este Número" o al final del artículo)

#### EMC

existe un curso en línea que cubre los contenidos de este artículo para los suscriptores del programa de cursos de EMC del AJP

#### Editorial

este artículo se discute en uno de los editoriales de este número

La Tabla de Contenidos de Este Número Está Disponible en Español

*(This issue's Table of Contents is available in Spanish)*

Presented in collaboration with the Office of Global Health, UMDNJ-Robert Wood Johnson Medical School

Translation courtesy of

Sergi Casals, M.A.

Garuna, Medellin, Colombia ([www.garunaeditors.com](http://www.garunaeditors.com))

Carlos Lopez Jaramillo, M.D.

Universidad de Antioquia, Medellin, Colombia

Javier I. Escobar, M.D., M.Sc.

UMDNJ-Robert Wood Johnson Medical School

Consulte *The American Journal of Psychiatry* en línea en [ajp.psychiatryonline.org](http://ajp.psychiatryonline.org)

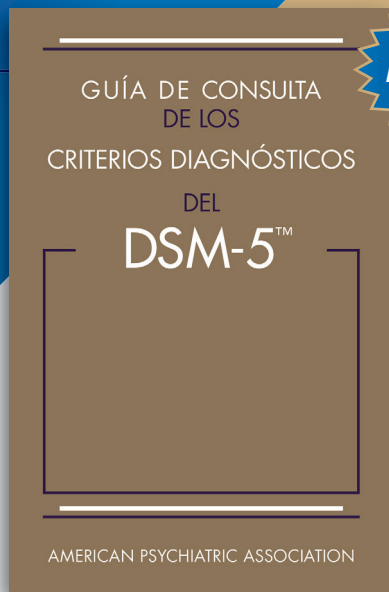

**Nuevo!**

## Guía de consulta de los criterios diagnósticos del DSM-5™

**Spanish Edition of the Desk Reference to the Diagnostic Criteria From DSM-5™**

American Psychiatric Association

La Guía de consulta de los criterios diagnósticos del DSM-5™ es una ayuda concisa y asequible para la referencia psiquiátrica fundamental, el DSM-5™. Incluye la clasificación diagnóstica completa revisada, así como todos los criterios diagnósticos del DSM-5™ en un formato fácil de utilizar. Esta cómoda referencia proporciona un acceso rápido a la información esencial para emitir un diagnóstico. Diseñado como complemento del DSM-5™, esta cómoda guía ayudará a los profesionales de la salud mental a incorporar los criterios diagnósticos del DSM-5™ en sus diagnósticos.

El Manual diagnóstico y estadístico de los trastornos mentales es la máxima referencia autorizada para la práctica clínica en el campo de la salud mental. Los cambios estructurales y diagnósticos de la quinta edición son un material que todos los clínicos “deben conocer”. La Guía de consulta de los criterios diagnósticos del DSM-5™ condensa la información diagnóstica actualizada esencial de este manual para ofrecer a los clínicos un recurso inestimable para diagnosticar con eficacia los trastornos mentales, desde el de mayor prevalencia al menos frecuente.

2014 • 490 pages • ISBN 978-0-89042-551-0 • Paperback • \$69.00 • Item #2551

*También disponible en Español*

### Aplicación para celular de los Criterios Diagnósticos del DSM-5™

La Aplicación Móvil de Criterios Diagnósticos DSM-5™ proporciona a los profesionales, investigadores y estudiantes de la salud mental un rápido acceso a códigos y criterios vitales de DSM para que puedan integrar por completo los nuevos datos en su práctica y sus estudios. Los usuarios tienen acceso completo fuera de línea a todos los conjuntos de criterios, además de acceso en línea a vídeos, comentarios y recursos de apoyo. Sus poderosas herramientas de personalización y de búsqueda ayudan y mejoran la valoración de las presentaciones de los síntomas en diversos entornos clínicos y administrativos.

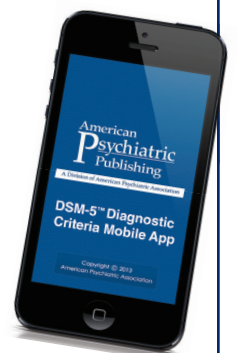

Ahora disponible para dispositivos iOS y Android.
